# Supplementary material for: Patterning of metal oxide thin films using a H2/He atmospheric pressure plasma jet
Source: Royal Society of Chemistry journal article supplement (doi:10.1039/d0gc00080a), 2020-01-01
Supplement: d0gc00080a1.pdf [file d0gc00080a1.pdf]

## Supporting Information

### Patterning of Metal Oxide Thin Films using H<sub>2</sub>/He Atmospheric Pressure Plasma Jet

*M. Emre Sener, Sanjayan Sathasivam, Robert Palgrave, Raul Quesada Cabrera, Daren J. Caruana\**

#### *Sample preparation:*

The copper oxide (Cu<sub>2</sub>O) films were deposited electrochemically on ITO coated glass substrate. Electrodeposition solution comprised of 0.4 M CuSO<sub>4</sub>·H<sub>2</sub>O and 3 M Lactic Acid (>85%, Sigma-Aldrich, UK), the pH of the plating solution was brought to pH 12 by addition of 5 M NaOH solution. The Cu<sub>2</sub>O layer was grown potentiostatically (PGSTAT100, Autolab, Windsor Scientific, UK) at -0.5 V vs. Ag/AgCl reference electrode using a large area copper wire counter electrode. The total deposition time was 30 minutes at 55°C.

All other films were deposited on SiO<sub>2</sub> (~50 nm) barrier coated float glass (NSG, UK) by atmospheric pressure aerosol assisted chemical vapour deposition on a horizontal bed reactor. The precursor solution was atomised using a piezoelectric ultrasonic humidifier (Johnson Matthey, UK) and passed over the substrate using a carrier gas at a flow rate of 1 L min<sup>-1</sup>. A stainless steel top plate was positioned 8 mm above the glass substrate to promote laminar flow of gases. The glass substrates were positioned on a heated graphite block with the deposition temperature monitored using platinum-rhodium thermocouples connected to a temperature controller (Eurotherm, UK).

All precursors and solvents were procured from Aldrich and used as received. The glass substrates were cleaned with detergent/water followed by propan-2-ol, then dried in an oven 80 °C. For TiO<sub>2</sub>, the precursors solution contained Titanium ethoxide (0.2 g) in toluene (20 mL) was aerosolized and transferred to the CVD chamber at a flow rate of 1 Lmin<sup>-1</sup> using N<sub>2</sub> (99.99%, BOC) carrier gas. For SnO<sub>2</sub>, coating the precursor solution contained butyltin trichloride (0.2 g) in methanol was aerosolized and transferred to the CVD chamber at a flow rate of 1 L min<sup>-1</sup> using compressed air (BOC) carrier gas. For ZnO, the precursors were zinc acetate hydrate (0.2 g) in methanol was aerosolized and transferred to the CVD chamber at a flow rate of 1 L min<sup>-1</sup> using N<sub>2</sub> (99.99%, BOC) carrier gas. For WO<sub>3</sub>, tungsten hexacarbonyl (0.05 g) in a mixture of acetone (20 mL) and methanol (5 mL) was aerosolized and transferred to the chamber at a flow rate of 1 Lmin<sup>-1</sup> using N<sub>2</sub> (99.99%, BOC) carrier gas. For all the coatings the deposition temperature was 500 °C, except for tungsten oxide which was carried out at 375 °C. The as deposited tungsten oxide films were then annealed under flow (0.5 L min<sup>-1</sup>) of air in the AACVD reactor at 500 °C to ensure complete oxidation and formation of WO<sub>3</sub>.

**Table S1:** Operating parameters of the plasma jet.

| Parameter                   | Value       |
|-----------------------------|-------------|
| Generator power             | 50 W        |
| Electrode voltage amplitude | 2 – 3 kV    |
| Plasma power                | 0.5 - 2 W   |
| Excitation frequency        | 13.56 MHz   |
| Modulation frequency        | 20 kHz      |
| Duty cycle                  | 20 %        |
| Temperature                 | 350 - 380 K |

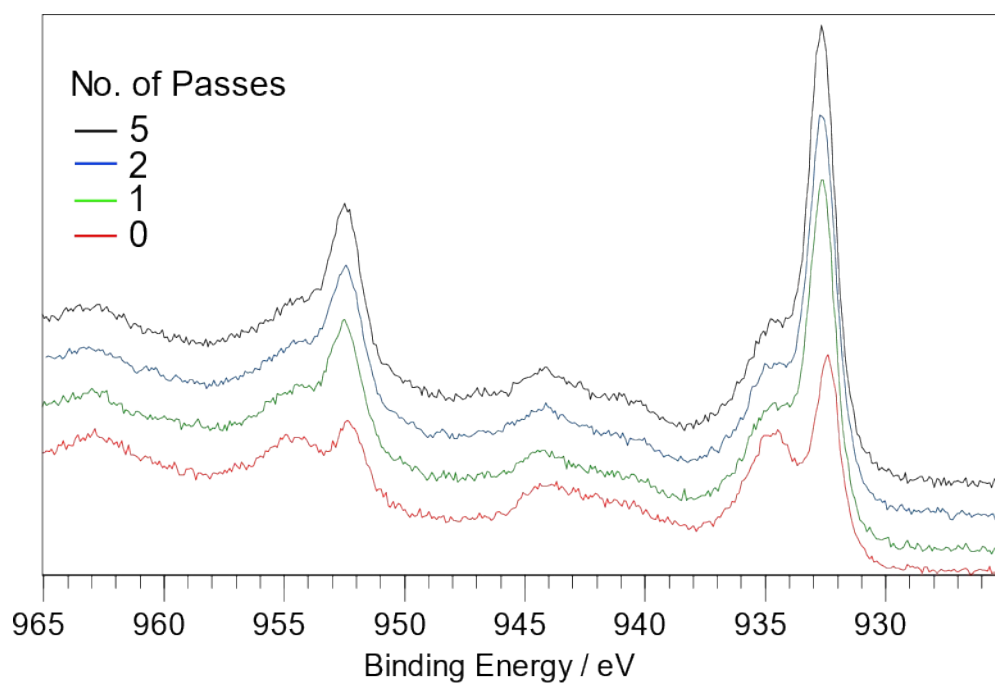

**Figure S1:** Cu 2p X-ray photoelectron spectra of the Cu<sub>2</sub>O film before / after plasma treatment and increasing plasma jet passes over the surface.

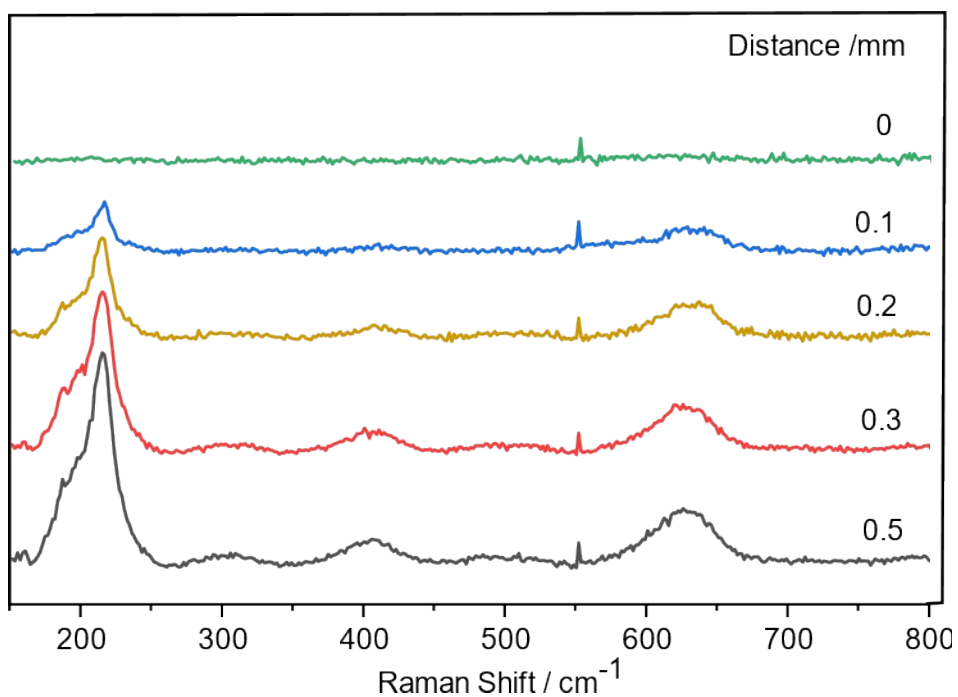

**Figure S2:** Raman spectra of the plasma treated copper track after 5 passes. Spectra taken along a 0.5 mm line extending out from the track centre( 0 mm) into the  $\text{Cu}_2\text{O}$  pristine (0.5 mm) surface.

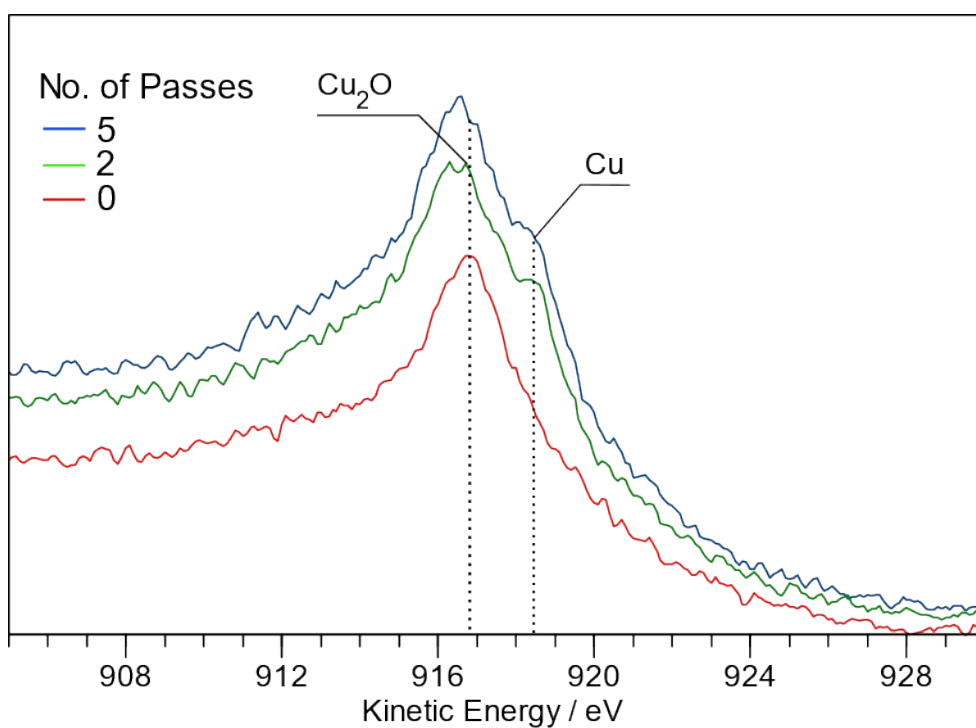

**Figure S3:** Auger electron spectra of the  $\text{Cu}_2\text{O}$  film before and after plasma treatment.

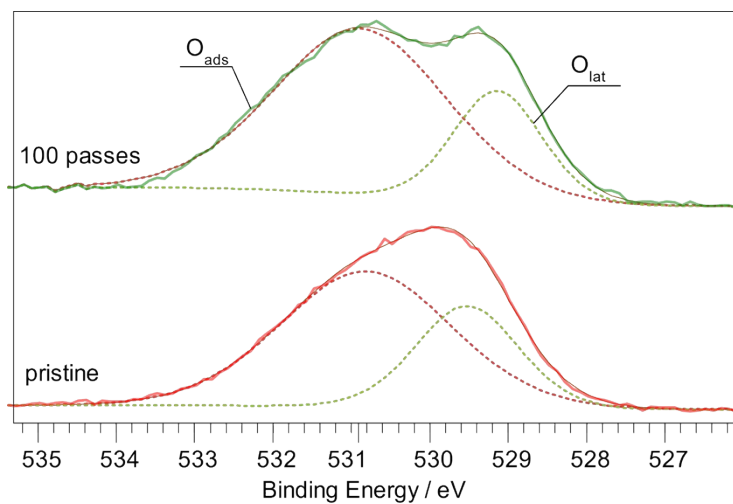

**Figure S4:** O 1s X-ray photoelectron spectrum of the pristine and reduced  $TiO_2$  surface with deconvoluted lattice ( $O_{lat}$ ) and adsorbed ( $O_{ads}$ ) oxygen components.

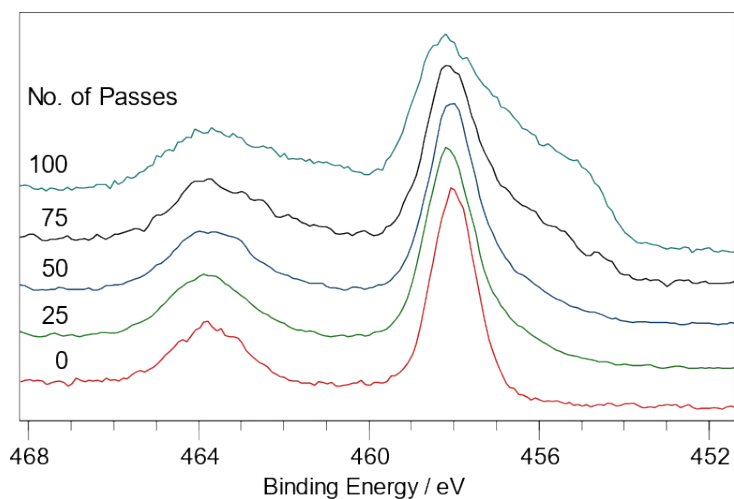

**Figure S5:** Ti 2p X-ray photoelectron spectra  $TiO_2$  film before / after plasma treatment and increasing plasma jet passes over the surface.

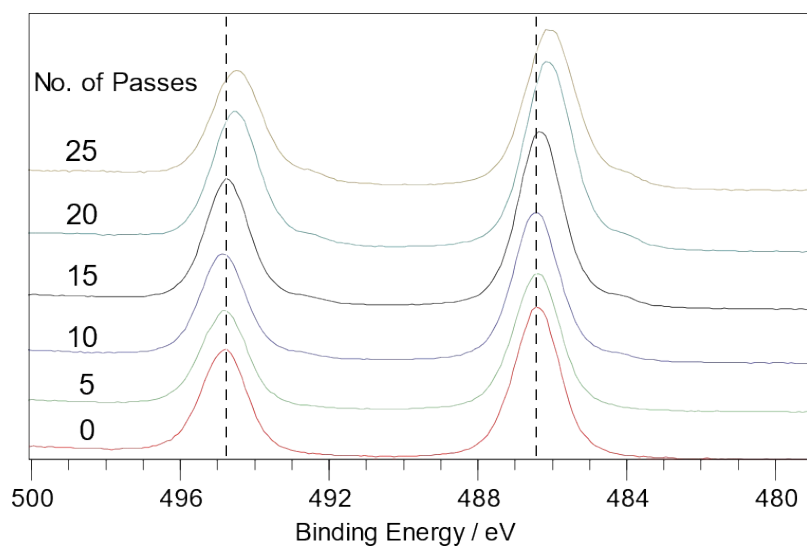

**Figure S6:** Sn 3d X-ray photoelectron spectra of the SnO<sub>2</sub> surface before / after plasma treatment and increasing plasma jet passes over the surface.

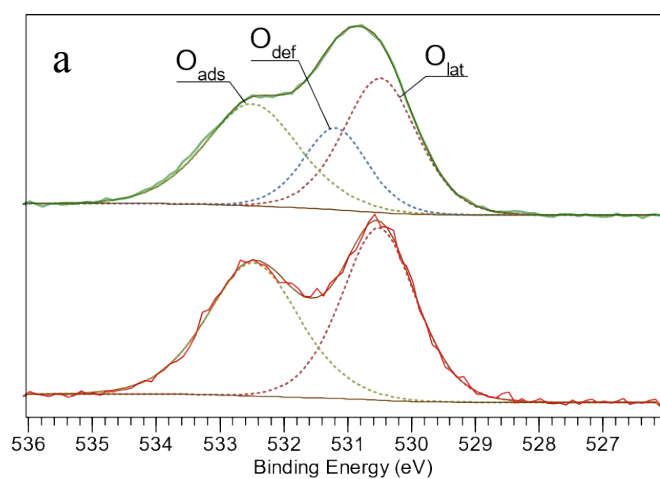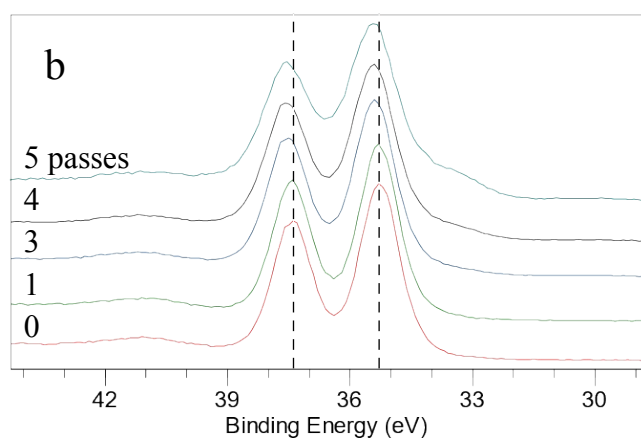

**Figure S7:** XPS spectra of O 1s from treated (green) and pristine (red) (a) and high-resolution W 4f XPS spectra from WO<sub>3</sub> surfaces as a function of number of passes.

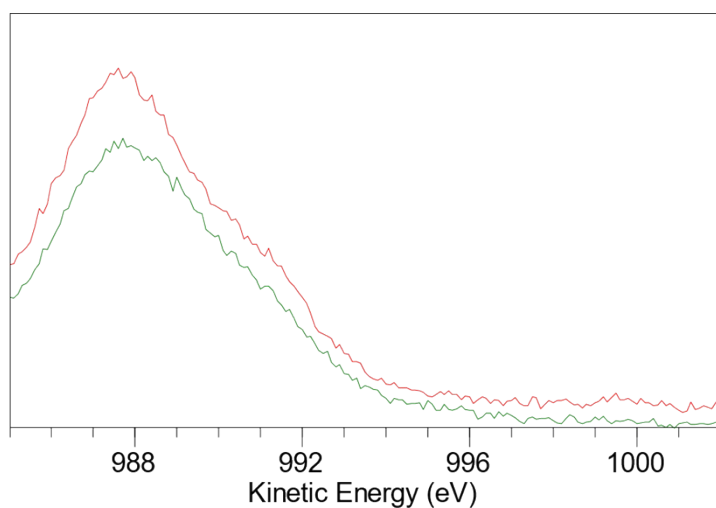

**Figure S8:** Zn LMM Auger electron spectra for treated (green) and pristine (red).

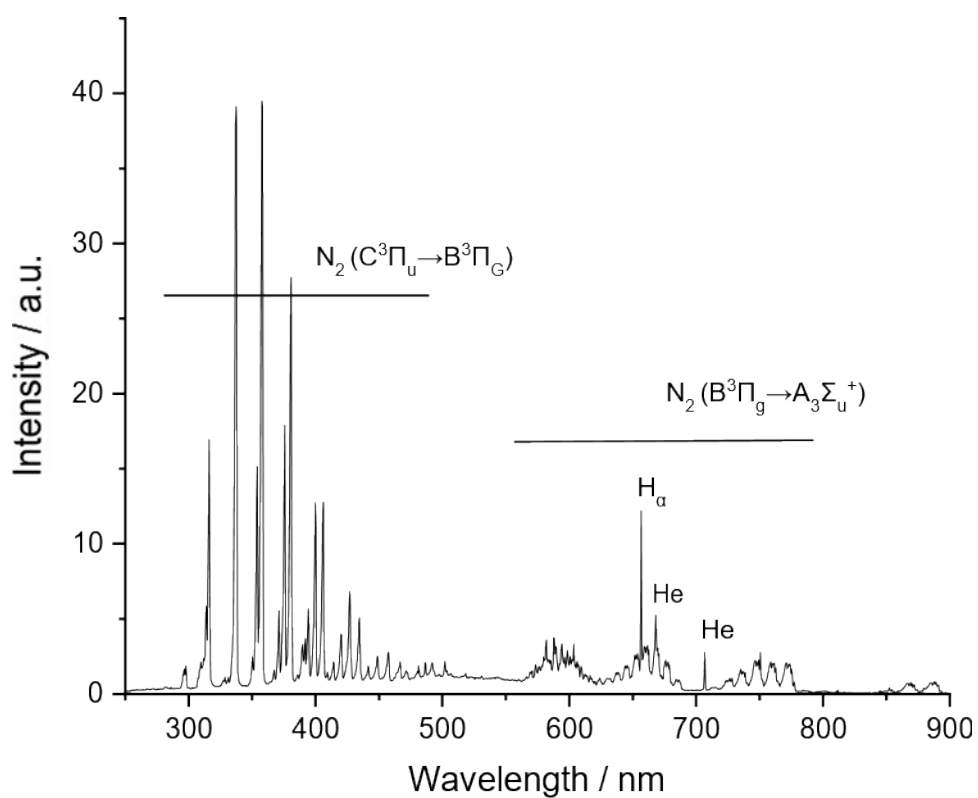

**Figure S9:** Optical emission spectrum of the plasma plume in the UV/Vis range.
